# Supplementary material for: Midgap-state-mediated two-step photoexcitation in nitrogen defect-modified g-C3N4 atomic layers for superior photocatalytic CO2 reduction
Source: Royal Society of Chemistry journal article supplement (doi:10.1039/c9cy00449a), 2019-01-01
Supplement: c9cy00449a1.pdf [file c9cy00449a1.pdf]

## Supplementary Information

### Midgap-state-mediated two-steps photoexcitation in nitrogen defective g-C<sub>3</sub>N<sub>4</sub> atomic layers for superior photocatalytic CO<sub>2</sub> reduction

Jie-Yinn Tang<sup>a</sup>, Xin Ying Kong<sup>a</sup>, Boon-Junn Ng<sup>a</sup>, Yi-Hao Chew<sup>a</sup>, Abdul Rahman Mohamed<sup>b</sup> and Siang-Piao Chai<sup>\*a</sup>

<sup>a</sup>Multidisciplinary Platform of Advanced Engineering, Chemical Engineering Discipline, School of Engineering, Monash University, Jalan Lagoon Selatan, Bandar Sunway, 47500 Selangor, Malaysia.

<sup>b</sup>Low Carbon Economy (LCE) Group, School of Chemical Engineering, Universiti Sains Malaysia, Engineering Campus, Seri Ampangan, 14300 Nibong Tebal, Pulau Pinang, Malaysia.

\*Correspondence to: [chai.siang.piao@monash.edu](mailto:chai.siang.piao@monash.edu)

## S1 Experimental procedure for bulk g-C<sub>3</sub>N<sub>4</sub> nanosheets

Bulk g-C<sub>3</sub>N<sub>4</sub> nanosheets (CN-B) were synthesized via thermal polymerization route with melamine as the precursor. 2g of melamine powder was transferred into a 50 ml alumina crucible with closed lid. The crucible was placed in a muffle furnace and heated at a designated temperature of 550°C for 4 hours. Upon completion of reaction, the product was allowed to cool to room temperature. The product was subsequently collected and washed with ethanol and deionized water for several times to eliminate any unreacted residue. Lastly, the product was dried overnight in a vacuum oven at 60°C, and CN-B in the form of yellow precipitate was obtained.

## S2 Nitrogen absorption-desorption isotherm and BJH pore size distribution of CN<sub>x</sub>-550

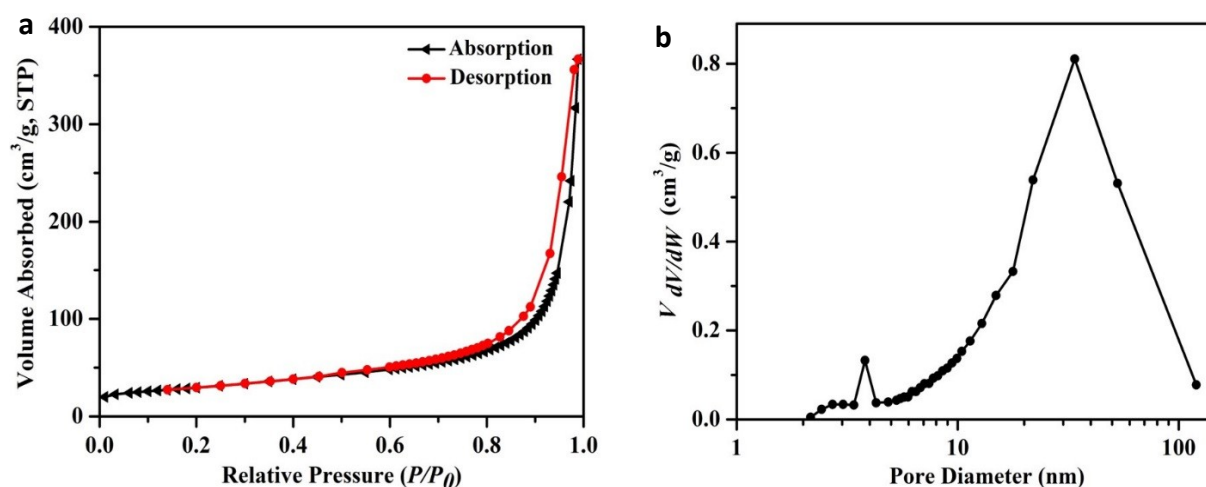

**Fig. S1** (a) Nitrogen adsorption-desorption isotherm and (b) BJH pore size distribution of CN<sub>x</sub>-550.

### S3 AFM topographic image of CN-B

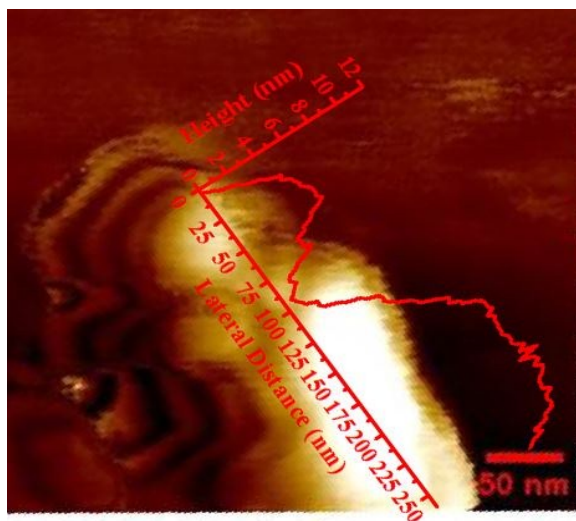

**Fig. S2** AFM topographic image and height profile of CN-B.

## S4 FTIR characterization

FTIR spectra in Fig. S3 depicts the molecular fingerprints of CN-U and CN<sub>x</sub>. The spectra exhibited three characteristic absorption bands of a conventional g-C<sub>3</sub>N<sub>4</sub> nanomaterials, which are affiliated to: (i) 800 cm<sup>-1</sup> for stretching of tri-s-triazine units; (ii) 1200 – 1700 cm<sup>-1</sup> for stretching of C-N heterocycles; and (iii) 3000 – 3400 cm<sup>-1</sup> for stretching of N-H or O-H functional group. Since the absorption band for N-H and O-H stretching vibrations was overlapped, this posed a challenge in justifying the variation of NH/NH<sub>2</sub> species that was involved in the reduction process.<sup>1</sup> The elimination of NH/NH<sub>2</sub> species in CN<sub>x</sub> could be further evaluated through XPS characterization.

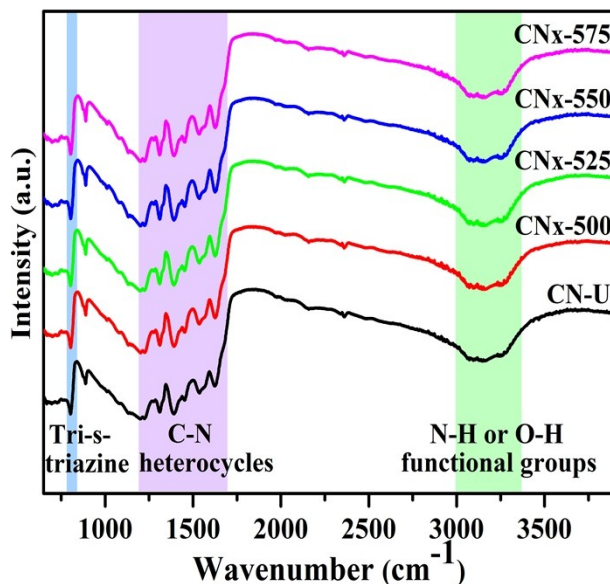

**Fig. S3** FTIR spectra of CN-U and CN<sub>x</sub>.

## S5 XPS characterization of CN<sub>x</sub>-550

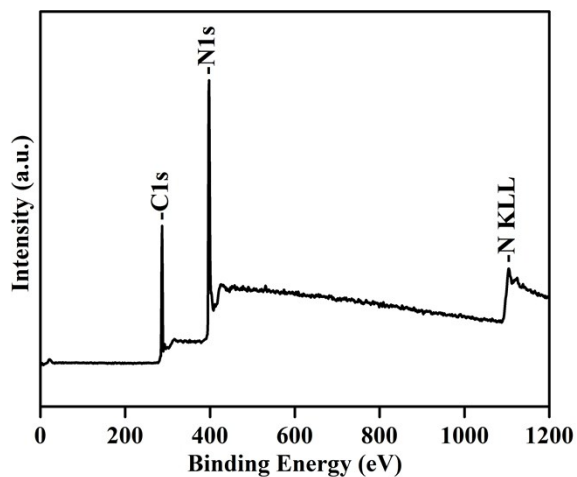

**Fig. S4** Full survey XPS spectrum of CN<sub>x</sub>-550.

**Table S1** Elemental composition of CN-U and CN<sub>x</sub>.

| Sample               | C at% | N at% | C:N Ratio |
|----------------------|-------|-------|-----------|
| CN-U                 | 40.33 | 59.67 | 0.676     |
| CN <sub>x</sub> -500 | 40.95 | 59.05 | 0.693     |
| CN <sub>x</sub> -525 | 42.04 | 57.96 | 0.725     |
| CN <sub>x</sub> -550 | 42.57 | 57.43 | 0.741     |
| CN <sub>x</sub> -575 | 43.54 | 56.46 | 0.771     |

**Table S2** XPS analysis of CN-U and CN<sub>x</sub>-550.

| Sample               | C 1s     |                   |       | N 1s     |                     |       |
|----------------------|----------|-------------------|-------|----------|---------------------|-------|
|                      | Position | Chem. State       | At%   | Position | Chem. State         | At%   |
| CN-U                 | 284.73   | C-C               | 4.73  | 398.6    | N(sp <sup>2</sup> ) | 68.62 |
|                      | 286.11   | C-NH <sub>x</sub> | 1.41  | 399.76   | N(sp <sup>3</sup> ) | 22.60 |
|                      | 288.19   | N-C-N             | 93.86 | 401.03   | NH <sub>x</sub>     | 8.77  |
| CN <sub>x</sub> -550 | 284.88   | C-C               | 1.67  | 398.6    | N(sp <sup>2</sup> ) | 68.42 |
|                      | 285.92   | C-NH <sub>x</sub> | 0.41  | 399.86   | N(sp <sup>3</sup> ) | 25.82 |
|                      | 288.29   | N-C-N             | 97.91 | 401.13   | NH <sub>x</sub>     | 5.75  |

## S6 UV-Vis characterization

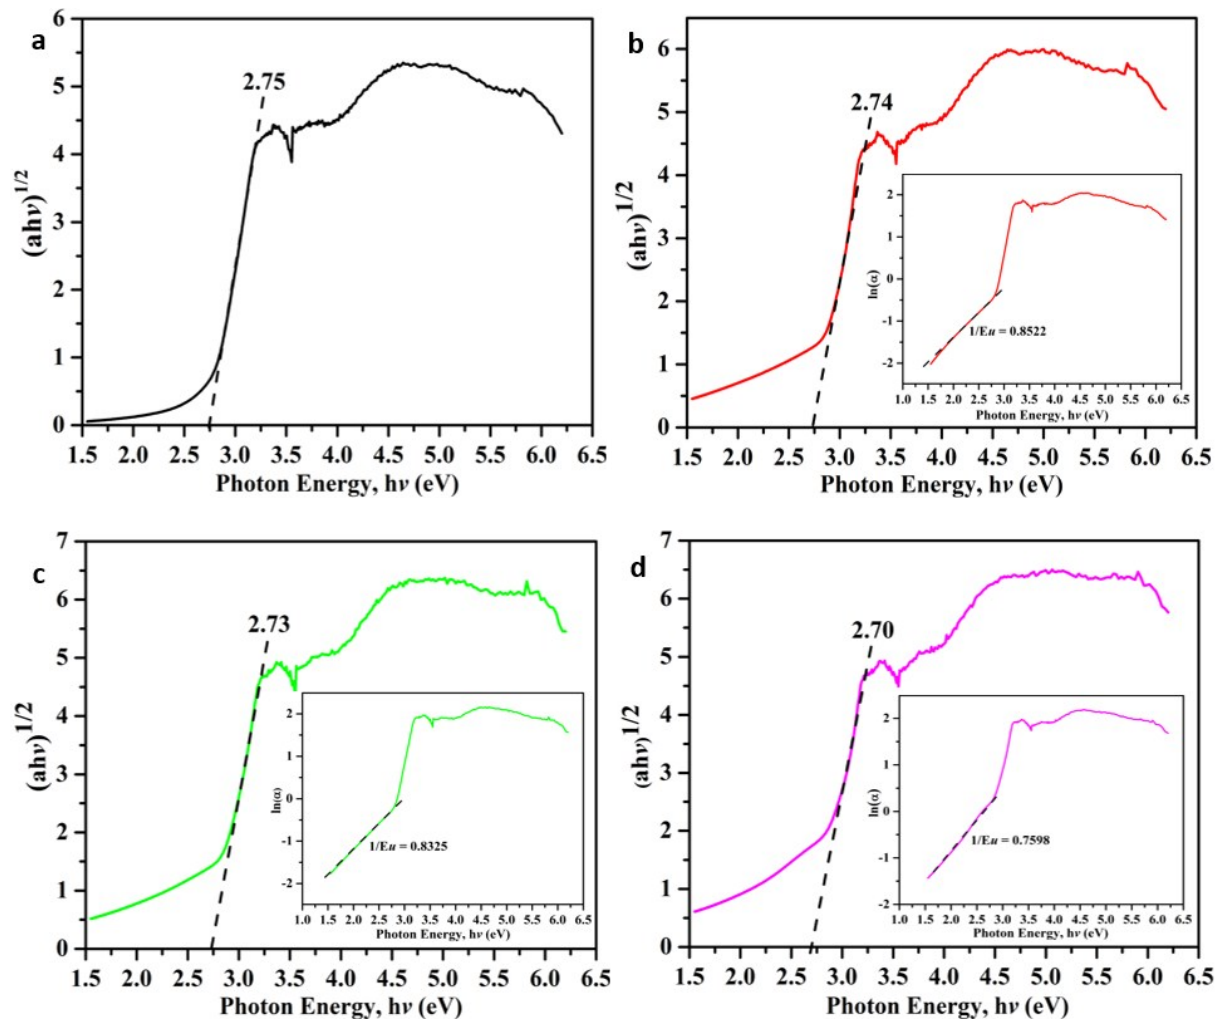

**Fig. S5** Tauc plot of transformed KM function versus photon energy of (a) CN-U, (b) CN<sub>x</sub>-500, (c) CN<sub>x</sub>-525 and (d) CN<sub>x</sub>-575. The insets show the corresponding Urbach plot of the sample photocatalysts.

## S7 Electrochemical characterization

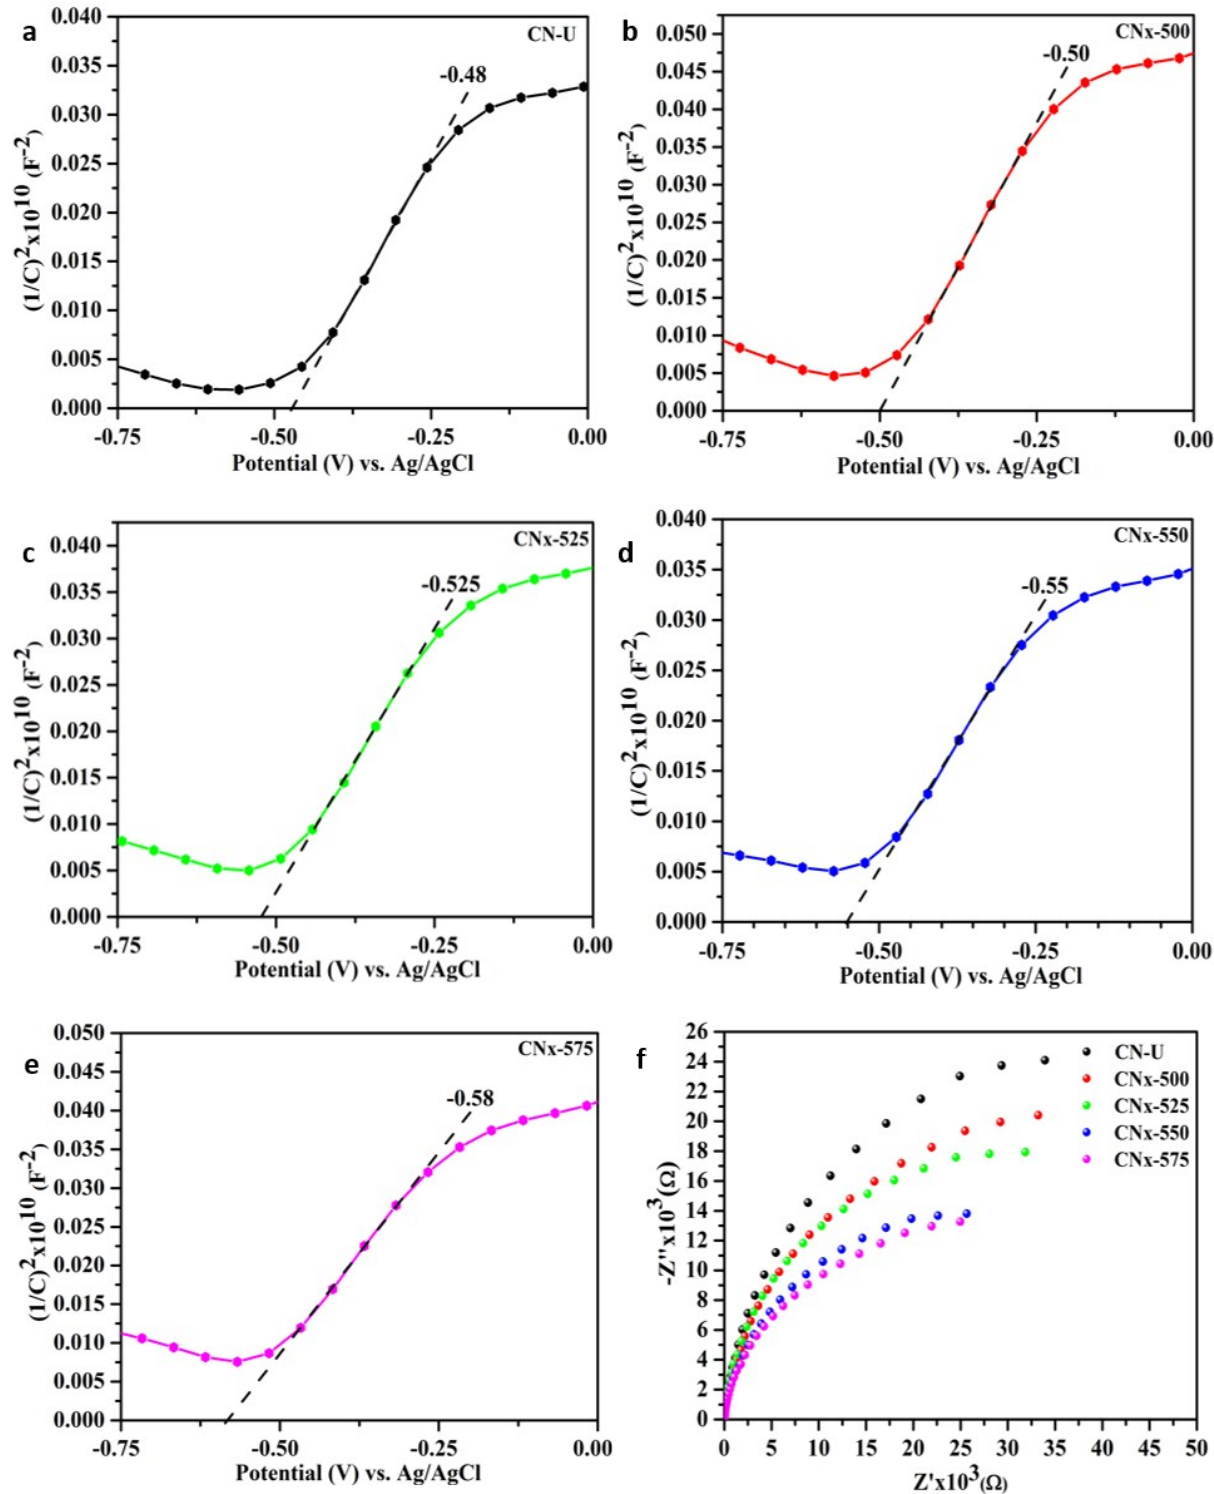

**Fig. S6** Electrochemical characterizations of sample photocatalysts. (a-e) Mott-Schottky plot of CN-U, CN<sub>x</sub>-500, CN<sub>x</sub>-525, CN<sub>x</sub>-550 and CN<sub>x</sub>-575 respectively. (f) Nyquist plot of CN-U and CN<sub>x</sub>.

## S8 O<sub>2</sub> evolution from photocatalytic CO<sub>2</sub> reduction and control experiments

As photocatalytic conversion of CO<sub>2</sub> to CH<sub>4</sub> gas is a cascade system which involves the oxidation of H<sub>2</sub>O species and CO<sub>2</sub> reduction, thereby a significant amount of O<sub>2</sub> gas was detected during the process. The photoreactor was purged thoroughly with humidified CO<sub>2</sub> gas prior to photocatalytic reaction for the removal of excess air in the reactor. Nevertheless, O<sub>2</sub> and N<sub>2</sub> residues remained traceable in the reactor effluent gas. Volumetric ratio of O<sub>2</sub> to N<sub>2</sub> in the effluent gas was thus measured for better quantification of O<sub>2</sub> evolution. As depicted in Fig. S7, a sharp decline in O<sub>2</sub>:N<sub>2</sub> ratio was observed in the first 1 hour of reaction. This drastic change can be ascribed to the consumption of residual O<sub>2</sub> to form O<sub>2</sub><sup>-</sup> species, as explained in the following equation:<sup>2,3</sup>

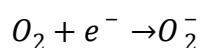

Meanwhile, generation of CH<sub>4</sub> from CO<sub>2</sub> reduction occurred concurrently upon photoirradiation. The residual O<sub>2</sub> competes with CO<sub>2</sub> for photogenerated electrons, conducting to less O<sub>2</sub> and CH<sub>4</sub> products formed. Since the reactor was much concentrated with CO<sub>2</sub> gas, there exists a greater tendency for CO<sub>2</sub> conversion into CH<sub>4</sub> by accepting the photogenerated electrons; while O<sub>2</sub> was generated through H<sub>2</sub>O oxidation with photogenerated holes. O<sub>2</sub> evolution eventually outcompetes the consumption of O<sub>2</sub> gas, and O<sub>2</sub>:N<sub>2</sub> ratio progressively increased as the reaction proceeded.

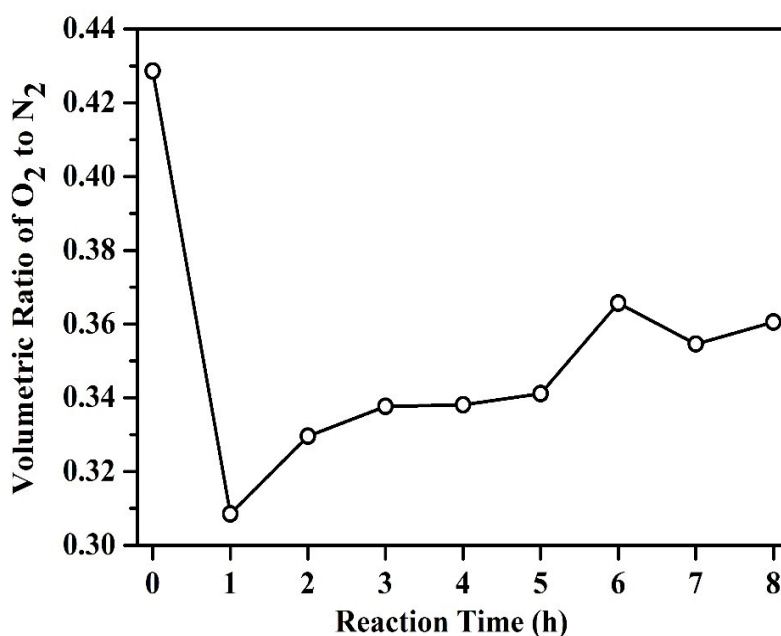

**Fig. S7** Time dependence of O<sub>2</sub>:N<sub>2</sub> volumetric ratio during photocatalytic CO<sub>2</sub> reduction experiment over CN<sub>x</sub>-550 under visible light irradiation.

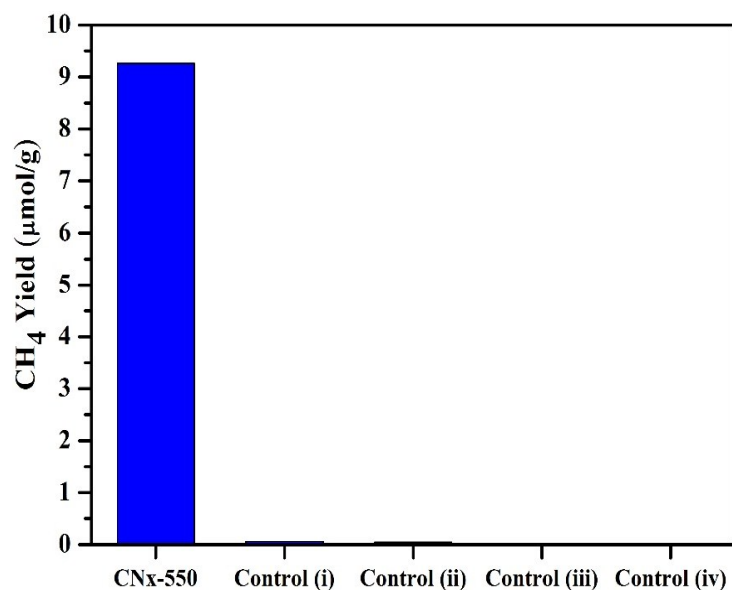

**Fig. S8** Yield of photocatalytic CH<sub>4</sub> evolution over CN<sub>x</sub>-550 under visible light illumination. Control experiments were performed under four scenarios: (i) under CO<sub>2</sub> flow in the absence of H<sub>2</sub>O vapour, (ii) under N<sub>2</sub>/H<sub>2</sub>O vapour flow, (iii) under CO<sub>2</sub>/H<sub>2</sub>O vapour environment without photocatalysts and lastly, (iv) in dark condition.

## References

- 1 Z. Hong, B. Shen, Y. Chen, B. Lin and B. Gao, *J. Mater. Chem. A*, 2013, **1**, 11754.
- 2 X. Y. Kong, W. L. Tan, B.-J. Ng, S.-P. Chai and A. R. Mohamed, *Nano Res.*, 2017, **10**, 1720–1731.
- 3 H. Zhao, L. Liu, J. M. Andino and Y. Li, *J. Mater. Chem. A*, 2013, **1**, 8209–8216.
